# Supplementary material for: Hyperglycaemia and risk of adverse perinatal outcomes: systematic review and meta-analysis
Source: PubMed Central journal article supplement (PMC5021824; doi:10.1136/bmj.i4694), 2016-09-13
Supplement: fard032237.ww1_default.pdf [file fard032237.ww1_default.pdf]

## Appendix 1: Full MEDLINE Search strategy [posted as supplied by author]

- 1 (pregnancy adj4 diabetes).ti,ab. (4082)
- 2 (gestational adj4 diabetes).ti,ab. (8108)
- 3 exp DIABETES, GESTATIONAL/ (7439)
- 4 gdm.ti,ab. (3272)
- 5 (glucose adj4 (pregnan\* or gestation\* or natal or maternal)).ti,ab. (3469)
- 6 1 or 2 or 3 or 4 or 5 (15075)
- 7 macrosomia.ti,ab. (2314)
- 8 exp FETAL MACROSOMIA/ (1826)
- 9 7 or 8 (3157)
- 10 exp BIRTH INJURIES/ (4937)
- 11 ((perinatal or labor or labour or birth) adj4 trauma).ti,ab. (1355)
- 12 ((perinatal or labor or labour or birth) adj4 injur\*).ti,ab. (2542)
- 13 ((perinatal or labor or labour or birth) adj4 complication\*1).ti,ab. (4372)
- 14 exp OBSTETRIC LABOR COMPLICATIONS/ (53369)
- 15 \*DYSTOCIA/ (1902)
- 16 (shoulder adj4 dystocia).ti,ab. (1021)
- 17 (fracture\*1 adj4 clavicle\*1).ti,ab. (1218)
- 18 (fracture\*1 adj4 humerus).ti,ab. (3451)
- 19 (fracture\*1 adj4 shoulder\*1).ti,ab. (753)
- 20 (fracture\*1 adj4 arm\*1).ti,ab. (454)
- 21 "erb\* palsy".ti,ab. (185)
- 22 neuropath\*.ti,ab. (97784)
- 23 exp BRACHIAL PLEXUS NEUROPATHIES/ (2817)
- 24 10 or 11 or 12 or 13 or 14 or 15 or 16 or 17 or 18 or 19 or 20 or 21 or 22 or 23 (168258)
- 25 (preeclampsia or pre-eclampsia).ti,ab. (20669)
- 26 exp PRE-ECLAMPSIA/ (24509)
- 27 25 or 26 (31679)
- 28 (heart adj4 (disorder\*1 or disease\*1)).ti,ab. (142562)
- 29 (cardiovascular adj4 (disorder\*1 or disease\*1)).ti,ab. (119950)
- 30 (cardiac adj4 (disorder\*1 or disease\*1)).ti,ab. (26958)
- 31 exp CARDIOVASCULAR DISEASES/ (1944605)
- 32 exp HEART DISEASES/ (922916)
- 33 28 or 29 or 30 or 31 or 32 (2024083)
- 34 exp HYPOGLYCEMIA/ (22500)
- 35 hypoglyc\*.ti,ab. (42033)
- 36 34 or 35 (48692)
- 37 exp DIABETES MELLITUS, TYPE 2/ (90640)
- 38 (("type 2" or "" type AND two" or "type II") adj4 diabet\*).ti,ab. (87156)
- 39 37 or 38 (121847)
- 40 exp OBESITY/ (152662)
- 41 (obesity or obese or bmi or "body mass" or overweight).ti,ab. (311123)

- 42 40 or 41 (343012)
- 43 9 or 24 or 27 or 33 or 36 or 39 or 42 (2561831)
- 44 (offspring or son\*1 or daughter\*1 or child or children or pediatric\*1 or paediatric\*1).ti,ab.  
(1177569)
- 45 exp CHILD OF IMPAIRED PARENTS/ (4392)
- 46 exp CHILD/ (1595153)
- 47 (maternal or mother\*2).ti,ab. (288181)
- 48 exp MOTHERS/ (27857)
- 49 44 or 45 or 46 or 47 or 48 (2246955)
- 50 43 and 49 (274768)
- 51 6 and 50 (4840)
- 52 51 not (animals/ not humans/) (4622)
