# Supplementary material for: Hyperglycaemia and risk of adverse perinatal outcomes: systematic review and meta-analysis
Source: PubMed Central journal article supplement (PMC5021824; doi:10.1136/bmj.i4694), 2016-09-13
Supplement: fard032237.ww3_default.pdf [file fard032237.ww3_default.pdf]

### Appendix 3: Supplementary tables and forest plots [posted as supplied by author]

**Table A. Results of the risk of bias assessment**

| Study          | Year of publication | Prospective or retrospective   | Representative population | Loss to follow up | Consistent glucose measurement | Consistent outcome measurement | 'Blinding'              |             | Selective reporting | Adjusted results presented |
|----------------|---------------------|--------------------------------|---------------------------|-------------------|--------------------------------|--------------------------------|-------------------------|-------------|---------------------|----------------------------|
|                |                     |                                |                           |                   |                                |                                | of glucose measurements | of outcomes |                     |                            |
| Atlantic DIP   | N/A                 | P                              | Low                       | Low               | Low                            | Low                            | High                    | High        | Low                 | Low                        |
| Aris           | 2014                | P                              | Low                       | Low               | Low                            | Low                            | Unclear                 | Unclear     | Low                 | Low                        |
| BiB            | N/A                 | P                              | Low                       | Low               | Low                            | Low                            | High                    | High        | Low                 | Low                        |
| Carr           | 2011                | R                              | Low/moderate              | Low               | Low                            | Low                            | High                    | High        | Low                 | Low                        |
| Chadna         | 2006                | R                              | Unclear                   | Low               | Unclear                        | Unclear                        | High                    | High        | Unclear             | High                       |
| Cheng          | 2007                | R                              | Low                       | Low               | Low                            | Unclear                        | High                    | High        | Unclear             | Low                        |
| Figueroa       | 2013                | Secondary analysis of RCT data | Low (but subset of trial) | Low               | Low                            | Low                            | Unclear                 | Unclear     | Low                 | Low                        |
| HAPO           | 2008                | P                              | Low                       | Low               | Low                            | Low                            | Low                     | Low         | Low                 | Low                        |
| HAPO           | 2010                | P                              | Low                       | Low               | Low                            | Low                            | Low                     | Low         | Low                 | Low                        |
| Hillier        | 2008                | Unclear                        | Low                       | Low               | Low                            | Unclear                        | Unclear                 | Unclear     | Unclear             | Low                        |
| Jensen         | 2001                | R                              | High (higher risk group)  | Low               | Low                            | Low                            | High                    | High        | Low                 | High                       |
| Kerenyi        | 2009                | Unclear                        | Low                       | Low               | Low                            | Low                            | Unclear                 | Unclear     | Unclear             | Low                        |
| Landon         | 2011                | Secondary analyses of RCT data | Low (subset of trial)     | Low               | Low                            | Low                            | Unclear                 | Low         | Low                 | Low                        |
| Lao            | 2003                | R                              | Low (Chinese)             | Low               | Low                            | Low                            | High                    | High        | Low                 | High                       |
| Little         | 1990                | P                              | Low                       | Low               | Low                            | Unclear                        | Unclear                 | Unclear     | Unclear             | High                       |
| Lurie          | 1998                | P                              | Low                       | Low               | Low                            | Low                            | Unclear                 | Low         | Low                 | High                       |
| Metzger        | 2010                | P                              | Low                       | Low               | Low                            | Low                            | Low                     | Low         | Low                 | Low                        |
| Moses          | 1995                | P                              | Low                       | Unclear           | Low                            | Low                            | Unclear                 | Unclear     | Low                 | High                       |
| Ong            | 2008                | R                              | Low                       | Low               | Low                            | Unclear                        | High                    | High        | Unclear             | High                       |
| Pettitt        | 1980                | P                              | High (Pima Indian)        | Low               | Low                            | Low                            | Unclear                 | Unclear     | Unclear             | High                       |
| Riskin-Mashia  | 2009                | R                              | Low                       | Low               | Low                            | Low                            | High                    | High        | Low                 | Limited adjustment         |
| Savona-Ventura | 2010                | R                              | Low                       | Low               | Low                            | Unclear                        | High                    | High        | Unclear             | High                       |
| Scholl         | 2001                | P                              | Low                       | Low               | Low                            | Low                            | Unclear                 | Unclear     | Low                 | Low                        |
| Sermer         | 1995                | P                              | Low                       | Low               | Low                            | Low                            | Low                     | Low         | Low                 | High                       |
| Tallarigo      | 1986                | Unclear                        | Low                       | Low               | Low                            | Low                            | Unclear                 | Unclear     | Low                 | High                       |
| Witter         | 1988                | R                              | Low, but young age group  | Low               | Low                            | Low                            | High                    | High        | Low                 | High                       |
| Yee            | 2011                | R                              | Low                       | Low               | Low                            | Low                            | High                    | High        | Low                 | Low                        |

R=retrospective, P=prospective,

**Table B. Analysis testing for linearity of association between glucose levels and outcomes**

| <b>Outcome</b>          | <b>Number of studies</b> | <b>Log odds ratio of glucose squared</b> | <b>95% CI</b>   | <b>P-value</b> |
|-------------------------|--------------------------|------------------------------------------|-----------------|----------------|
| <b>Fasting 75g OGTT</b> |                          |                                          |                 |                |
| C-section               | 6                        | -0.115                                   | (-0.25 - 0.02)  | 0.1            |
| Induction               | 3                        | -0.197                                   | (-0.52 - 0.13)  | 0.23           |
| Instrumental birth      | 3                        | 0.107                                    | (-0.21 - 0.42)  | 0.5            |
| LGA                     | 7                        | -0.02                                    | (-0.16 - 0.12)  | 0.77           |
| Macrosomia              | 6                        | -0.18                                    | (-0.39 - 0.03)  | 0.09           |
| Neonatal hypoglycemia   | 2                        | 0.29                                     | (0.05 - 0.53)   | 0.02           |
| PIH/Pre-eclampsia       | 3                        | 0.461                                    | (0.03 - 0.9)    | 0.04           |
| Pre-eclampsia           | 4                        | -0.005                                   | (-0.28 - 0.27)  | 0.97           |
| Preterm birth           | 3                        | 0.577                                    | (0.09 - 1.07)   | 0.02           |
| Shoulder dystocia       | 4                        | -0.142                                   | (-1.06 - 0.78)  | 0.76           |
| <b>50g OGCT</b>         |                          |                                          |                 |                |
| C-section               | 7                        | -0.029                                   | (-0.07 - 0.01)  | 0.18           |
| Instrumental birth      | 2                        | -0.008                                   | (-0.08 - 0.07)  | 0.84           |
| LGA                     | 4                        | -0.044                                   | (-0.1 - 0.01)   | 0.11           |
| Macrosomia              | 7                        | -0.004                                   | (-0.02 - 0.02)  | 0.69           |
| Neonatal hypoglycemia   | 3                        | 0.047                                    | (-0.18 - 0.27)  | 0.68           |
| Pre-eclampsia           | 6                        | -0.082                                   | (-0.15 - -0.02) | 0.01           |
| Preterm birth           | 2                        | 0.021                                    | (-0.05 - 0.09)  | 0.55           |
| Shoulder dystocia       | 2                        | -0.113                                   | (-0.25 - 0.03)  | 0.12           |
| <b>2 hour 75g OGTT</b>  |                          |                                          |                 |                |
| C-section               | 9                        | -0.016                                   | (-0.03 - 0.00)  | 0.06           |
| Induction               | 3                        | 0.006                                    | (-0.04 - 0.05)  | 0.81           |
| Instrumental birth      | 4                        | -0.01                                    | (-0.05 - 0.03)  | 0.65           |
| LGA                     | 11                       | 0.004                                    | (-0.01 - 0.02)  | 0.67           |
| Macrosomia              | 7                        | 0.006                                    | (-0.03 - 0.05)  | 0.77           |
| Neonatal hypoglycemia   | 3                        | 0.002                                    | (-0.02 - 0.03)  | 0.91           |
| PIH/Pre-eclampsia       | 3                        | 0.02                                     | (-0.07 - 0.11)  | 0.67           |
| Pre-eclampsia           | 4                        | -0.026                                   | (-0.05 - 0.00)  | 0.05           |
| Preterm birth           | 6                        | 0.009                                    | (-0.05 - 0.07)  | 0.78           |
| Shoulder dystocia       | 5                        | -0.067                                   | (-0.19 - 0.06)  | 0.29           |

**Figure A. Odd ratios for outcomes at one and two-hour and combined for the 75g and 100g post-load OGTT**

**One hour post-load 75g OGTT**

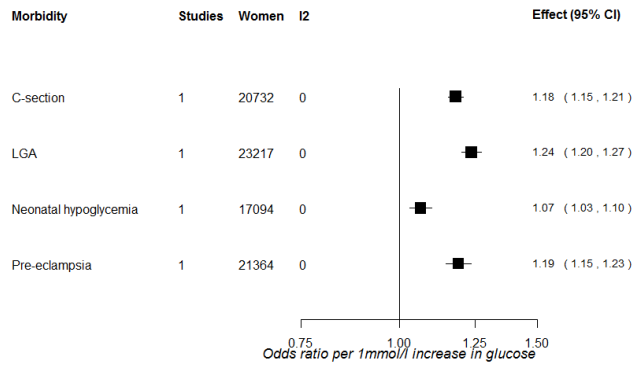

**One-hour post-load 100g OGTT**

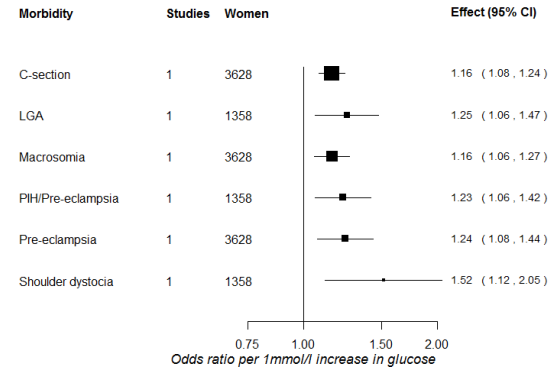

**Combining 75g and 100g OGTT tests - Two hour post-load**

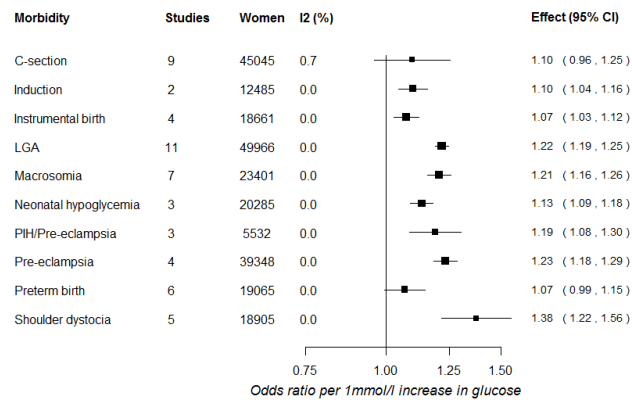

**Figure B. Associations for fasting, one-hour post-load 50g OGCT and two-hour post-load 75g OGTT and Caesarean section**

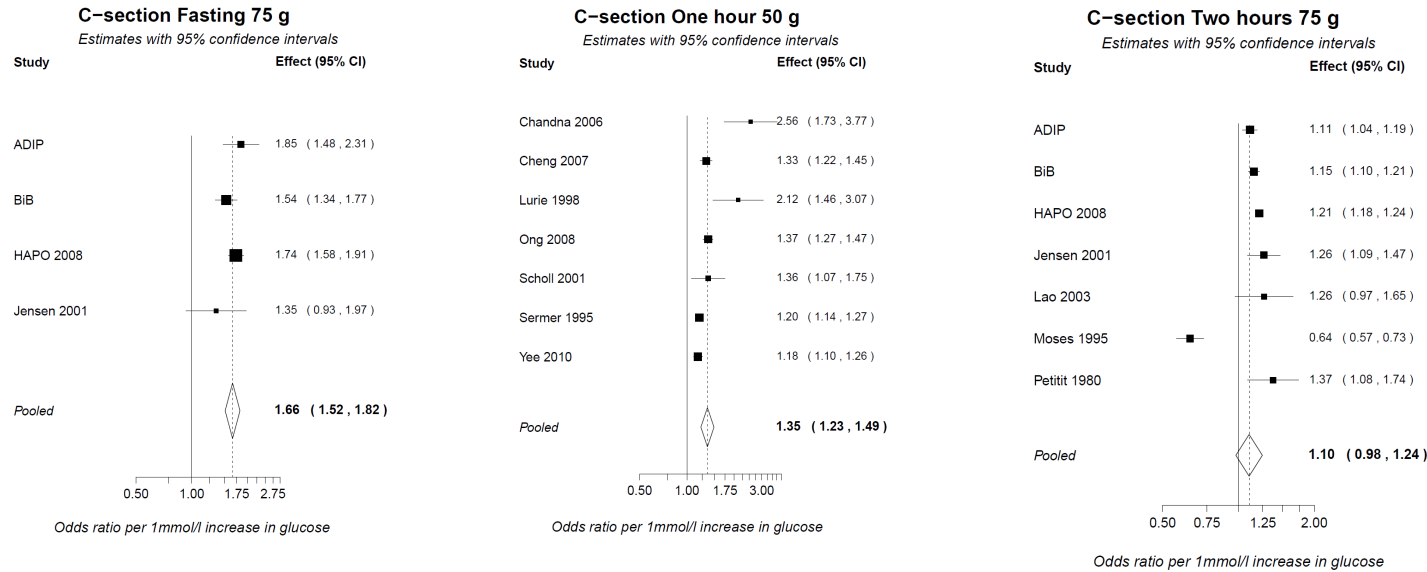

**Figure C. Associations for fasting, one-hour post-load 50g OGCT and two-hour post-load 75g OGTT and Large for gestational age**

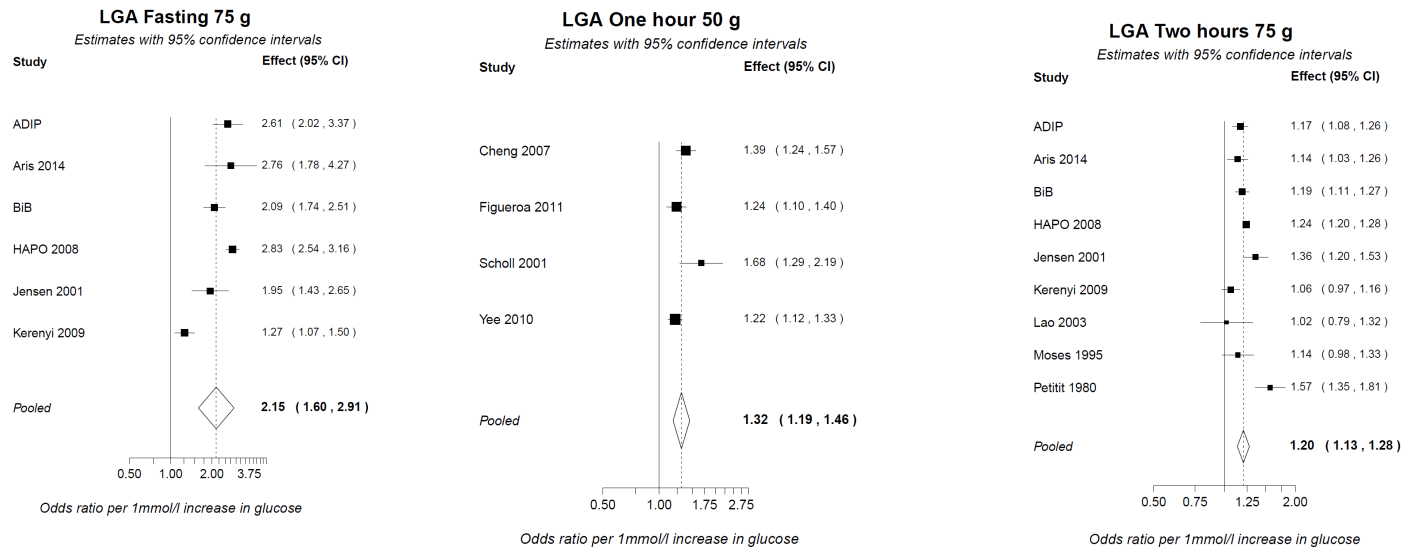

**Figure D. Associations for fasting, one-hour post-load 50g OGCT and two-hour post-load 75g OGTT and macrosomia**

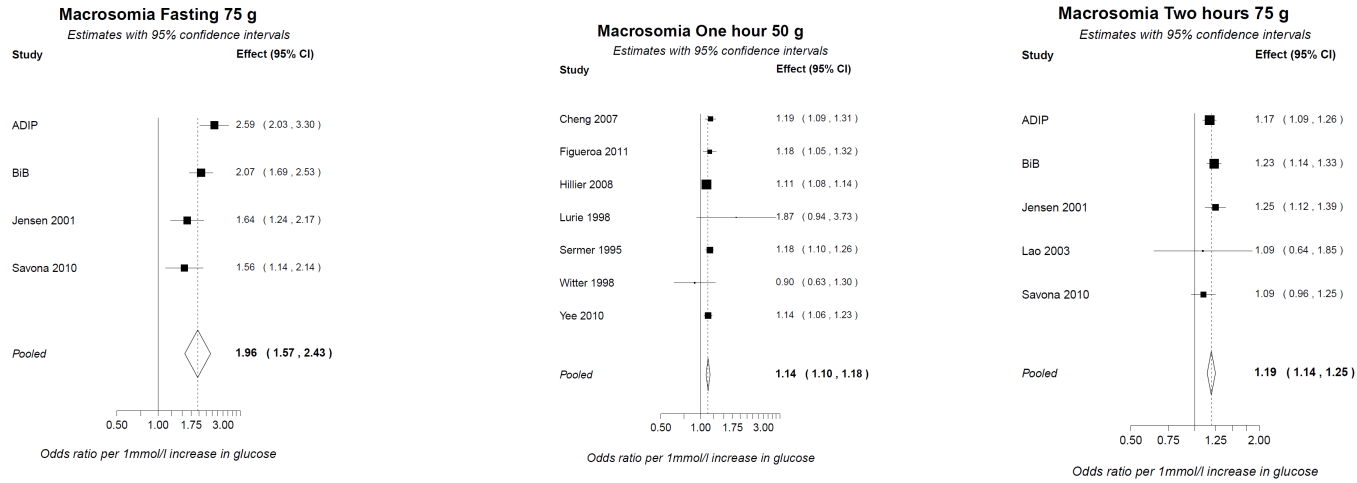

**Figure E. Associations for fasting, one-hour post-load 50g OGCT and two-hour post-load 75g OGTT and induction of labour**

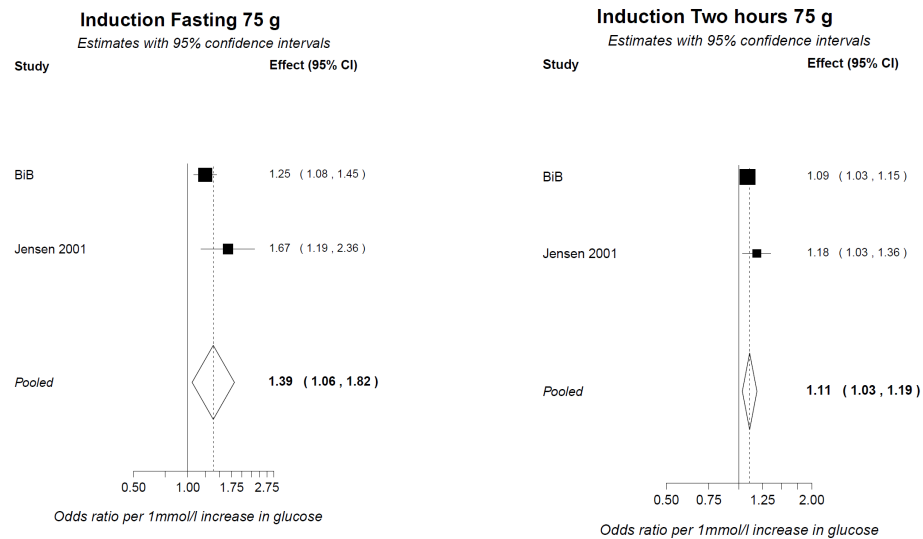

**Figure F. Associations for fasting, one-hour post-load 50g OGCT and two-hour post-load 75g OGTT and instrumental birth**

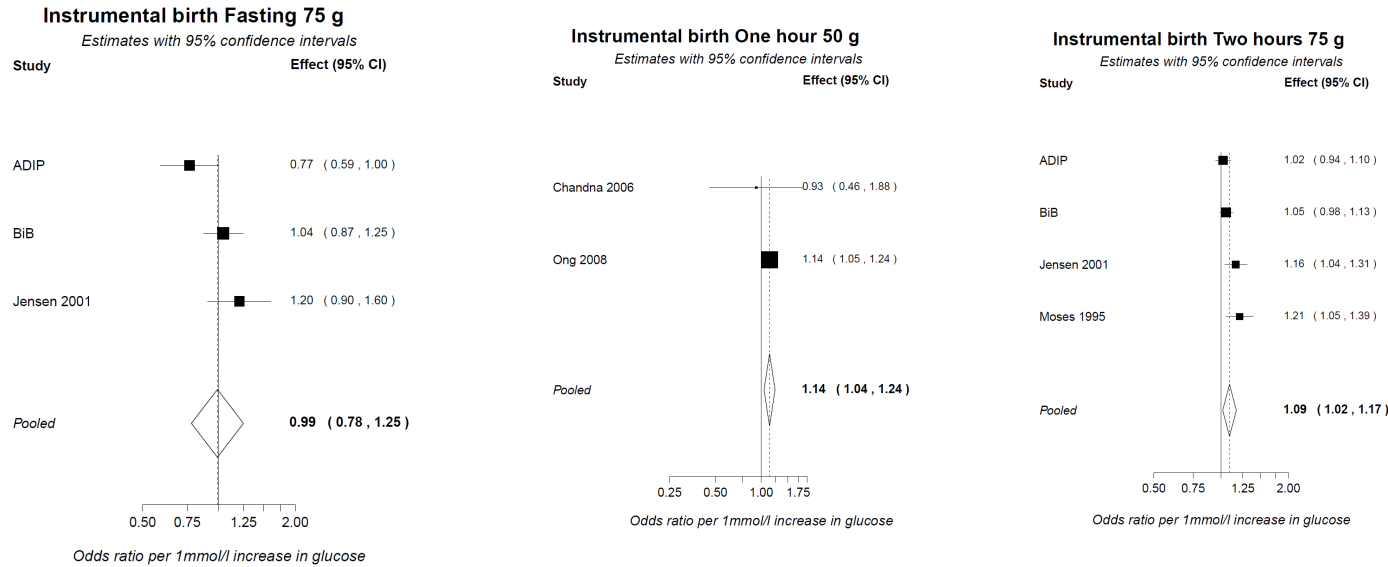

**Figure G. Associations for fasting, one-hour post-load 50g OGCT and two-hour post-load 75g OGTT and macrosomia**

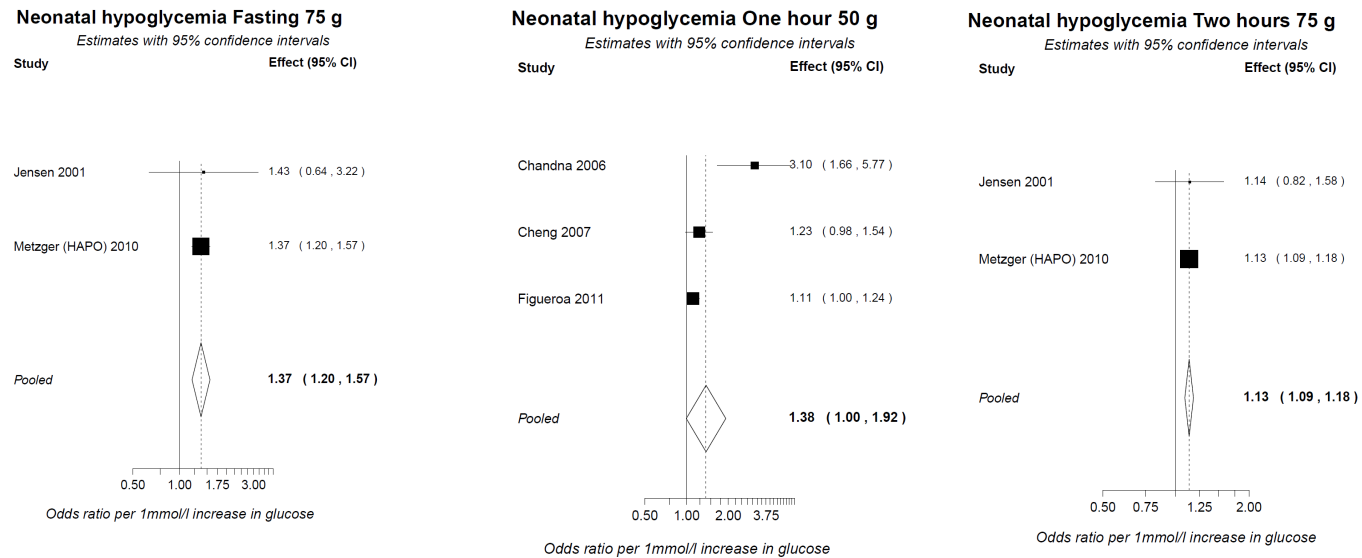

**Figure H. Associations for fasting, one-hour post-load 50g OGCT and two-hour post-load 75g OGTT and pre-eclampsia**

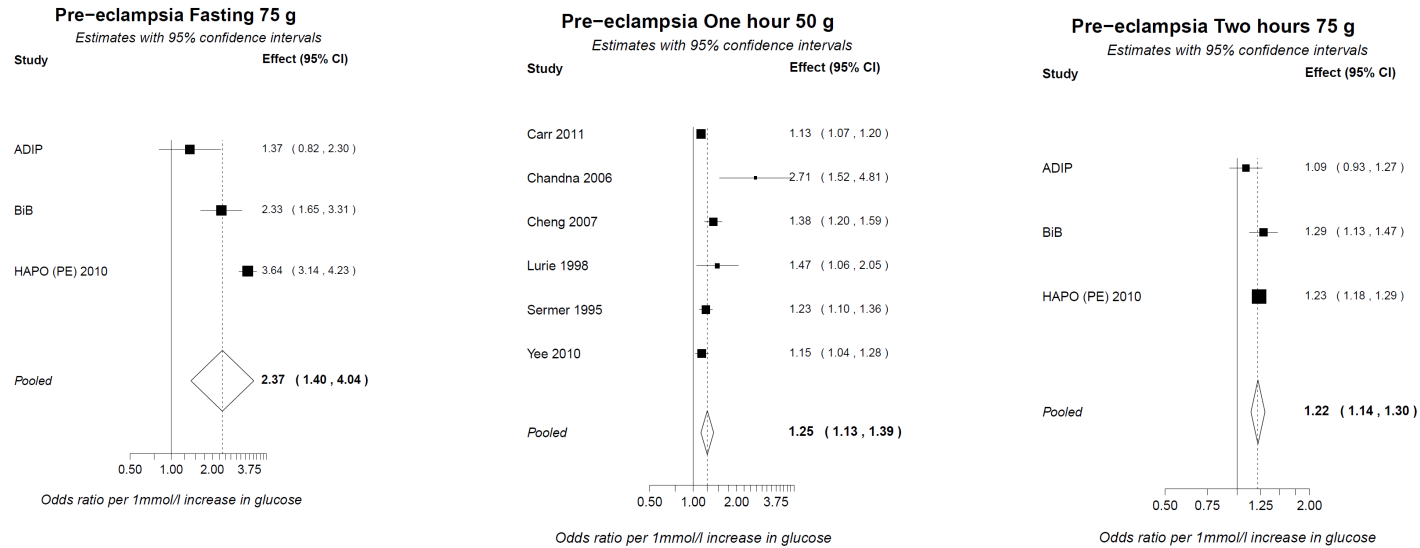

**Figure I. Associations for fasting, one-hour post-load 50g OGCT and two-hour post-load 75g OGTT and preterm birth**

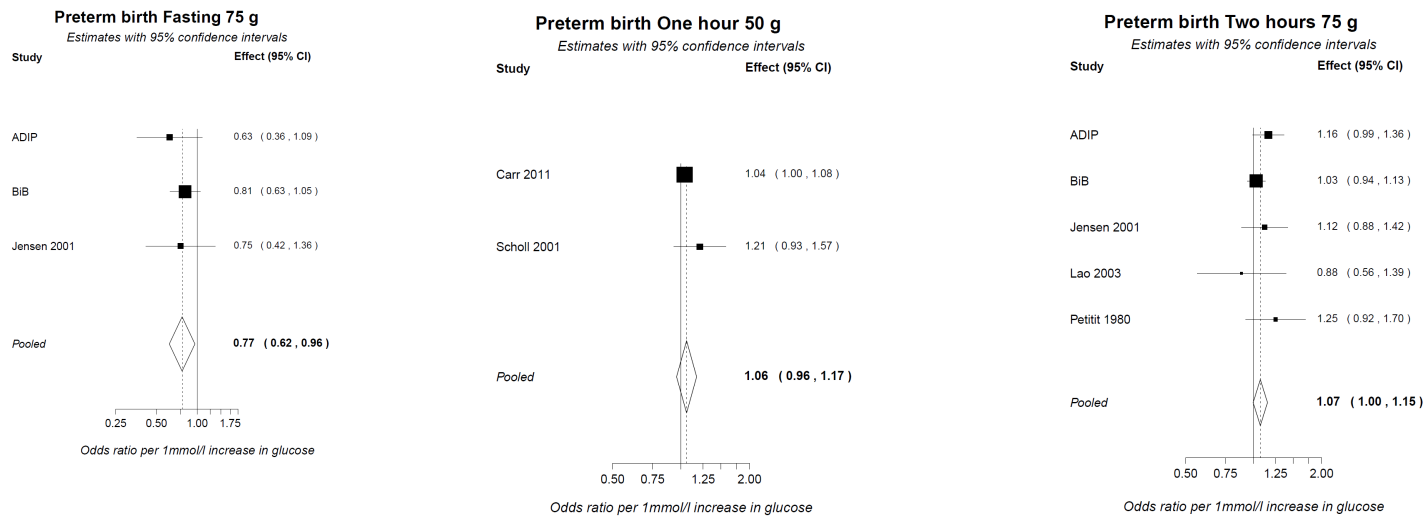

**Figure J. Associations for fasting, one-hour post-load 50g OGCT and two-hour post-load 75g OGTT and shoulder dystocia**

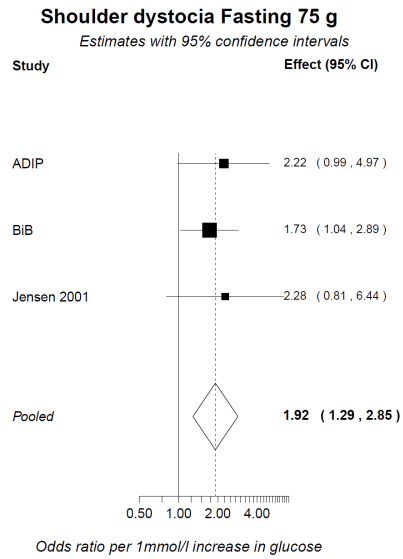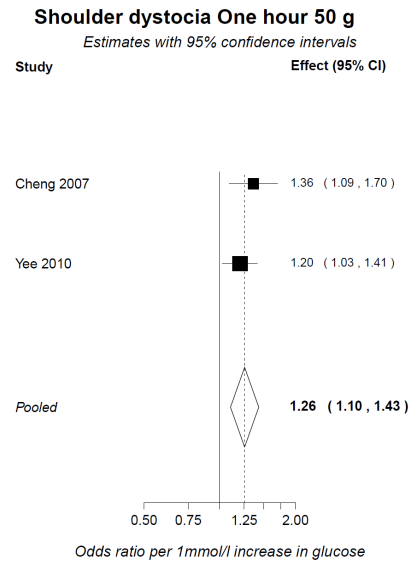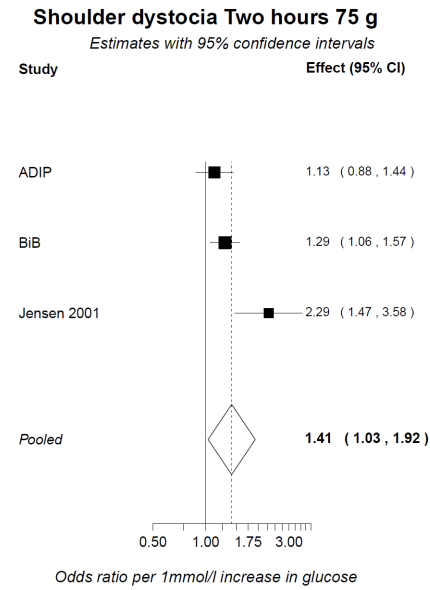



**Figure K. Odd ratios for outcomes at fasting 75g and 100g OGTT combined and grouped by whether blinded or unblinded/unclear**

**Combined 75g and 100g OGTT Fasting**

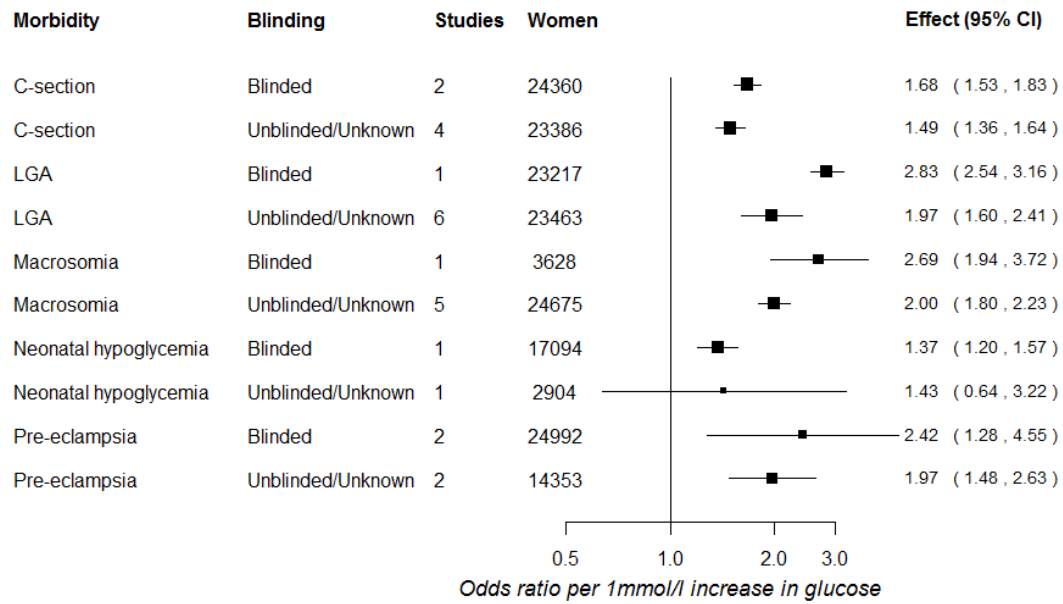

**Figure L. Odd ratios for outcomes at two-hour post-load 75g and 100g OGTT combined and grouped by whether blinded or unblinded/unclear**

**Combined 75g and 100g OGTT Two hours**

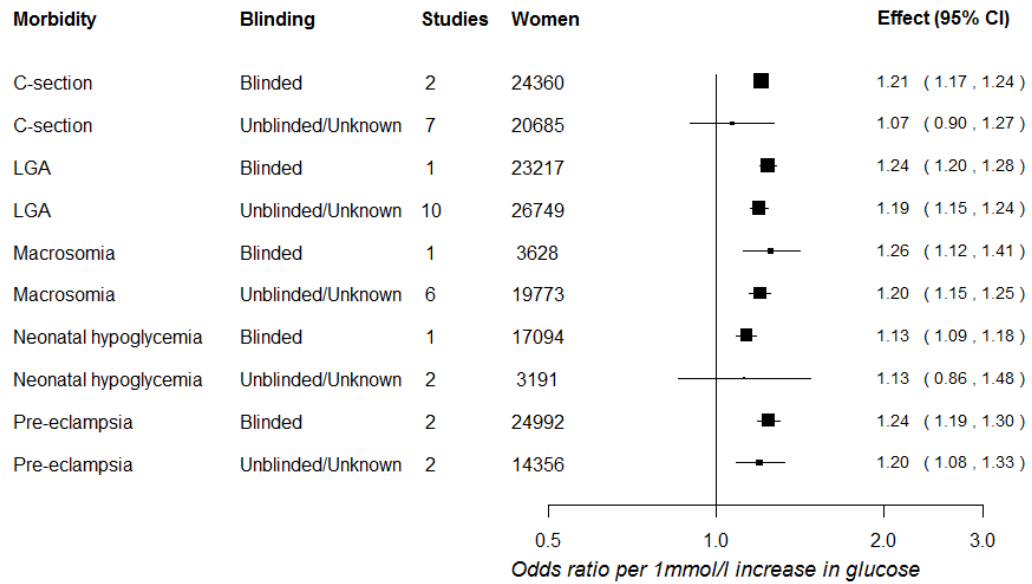

Figure M. Odd ratios for outcomes at fasting 75g and 100g OGTT combined and grouped by region

**Combined 75g and 100g OGTT Fasting**

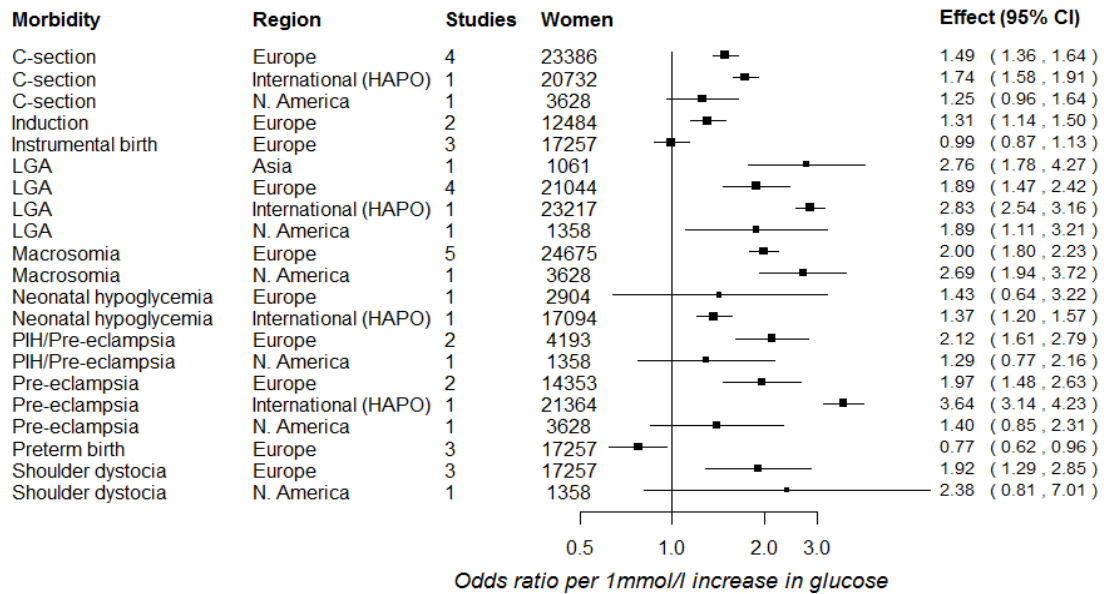

N. America (North America= Canada and USA),<sup>1</sup> Multinational,<sup>2-4</sup> Asia (Singapore, China),<sup>5,6</sup> Europe (Denmark, Hungary, Malta UK),<sup>7-11</sup> Australia<sup>12</sup>

Figure N. Odd ratios for outcomes at two-hour post-load 75g OGTT grouped by region

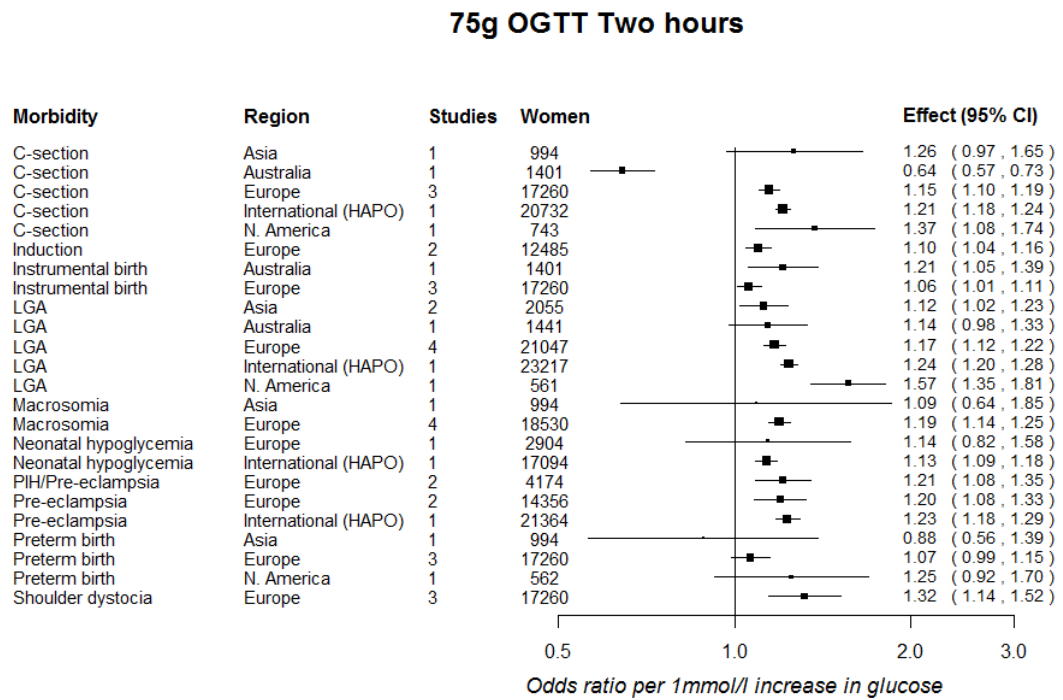

N. America (North America= Canada and USA),<sup>1</sup> Multinational,<sup>2-4</sup> Asia (Singapore, China),<sup>5,6</sup> Europe (Denmark, Hungary, Malta UK),<sup>7-11</sup> Australia<sup>12</sup>

## References

1. Pettitt DJ, Knowler WC, Baird HR, Bennett PH. Gestational diabetes: infant and maternal complications of pregnancy in relation to third-trimester glucose tolerance in the Pima Indians. *Diabetes Care*. 1980; 3(3): 458-64.
2. HAPO Hyperglycemia and Adverse Pregnancy Outcomes. *N Engl J Med*. 2008; 358: 1991-2002.
3. HAPO Study Cooperative Research Group. Hyperglycemia and adverse pregnancy outcome (HAPO) study: preeclampsia. *Am J Obstet Gynecol*. 2010; 202(3): e1-e7.
4. Metzger BE, Persson B, Lowe LP, Dyer AR, Cruickshank JK, Deerochanawong C, et al. Hyperglycemia and Adverse Pregnancy Outcome Study: Neonatal Glycemia. *Pediatrics*. 2010; 126(6): e1545-e52.
5. Aris IM, Soh SE, Tint MT, Liang S, Chinnadurai A, Saw SM, et al. Effect of Maternal Glycemia on Neonatal Adiposity in a Multiethnic Asian Birth Cohort. *J Clin Endocrinol Metab*. 2014; 99(1): 240–7.
6. Lao TT, Ho LF. Does maternal glucose intolerance affect the length of gestation in singleton pregnancies? *J Soc Gynecol Invest*. 2003; 10(6): 366-71.
7. Jensen DM, Damm P, Sorensen B, Molsted-Pedersen L, Westergaard JG, Klebe J, et al. Clinical impact of mild carbohydrate intolerance in pregnancy: a study of 2904 nondiabetic Danish women with risk factors for gestational diabetes mellitus. *Am J Obstet Gynecol*. 2001; 185(2): 413-9.
8. Kerényi Z, Tamás G, Kivimäki M, Péterfalvi A, Madarász E, Bosnyák Z, et al. Maternal Glycemia and Risk of Large-for-Gestational-Age Babies in a Population-Based Screening. *Diabetes Care*. 2009; 32(12): 2200-5.
9. Savona-Ventura C, Craus J, Vella K, Grima S. Lowest threshold values for the 75g oral glucose tolerance test in pregnancy. *Malta Med J*. 2010; 22(1): 18-20.
10. Wright J. Born in Bradford cohort. *Personal communication*. 2014.
11. Dunne F. Atlantic Diabetes in Pregnancy cohort. *Personal communication*. 2014.
12. Moses RGF, Calvert DP. Pregnancy Outcomes in Women Without Gestational Diabetes Mellitus Related to the Maternal Glucose Level: Is there a continuum of risk? *Diabetes Care*. 1995; 18(12): 1527-33.
