# Supplementary material for: Hyperglycaemia and risk of adverse perinatal outcomes: systematic review and meta-analysis
Source: PubMed Central journal article supplement (PMC5021824; doi:10.1136/bmj.i4694), 2016-09-13

**Appendix 4:** Risks of all outcomes against glucose concentrations for each study, glucose test, and timing [posted as supplied by author]

**Fig A** Risk of caesarean section against glucose concentration for each study, glucose test, and timing

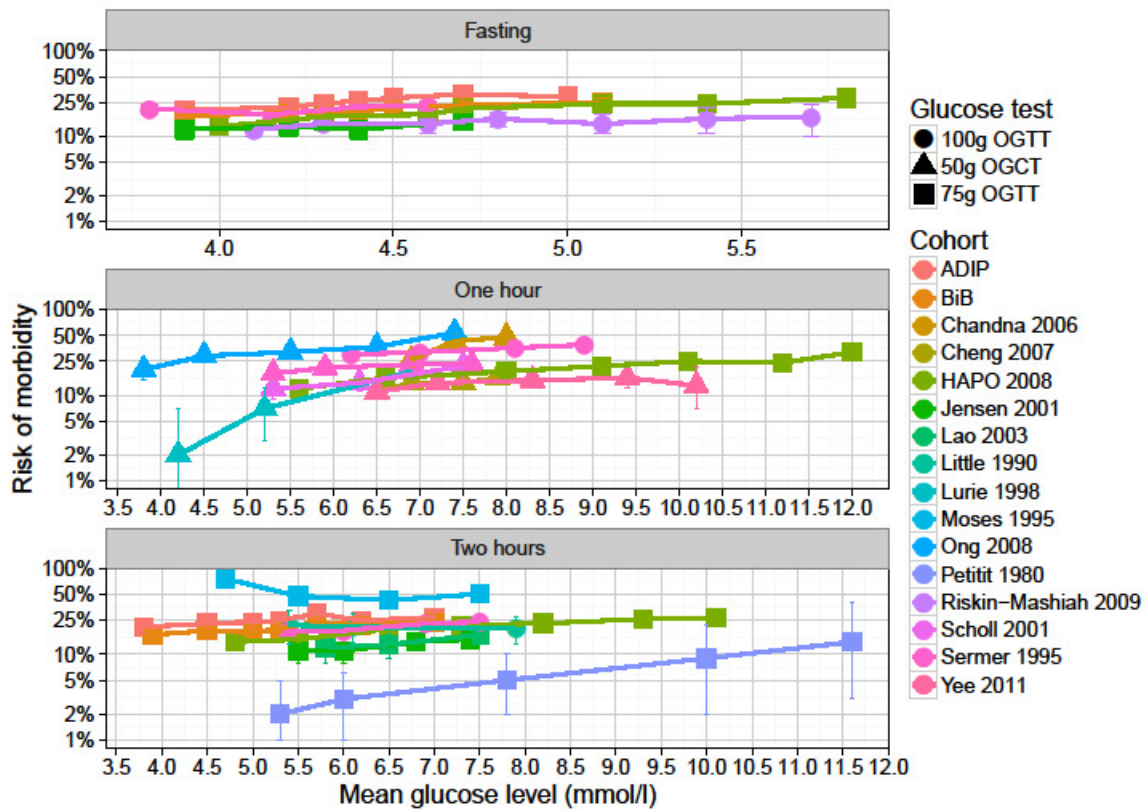

**Fig B** Risk of macrosomia against glucose concentration for each study, glucose test, and timing

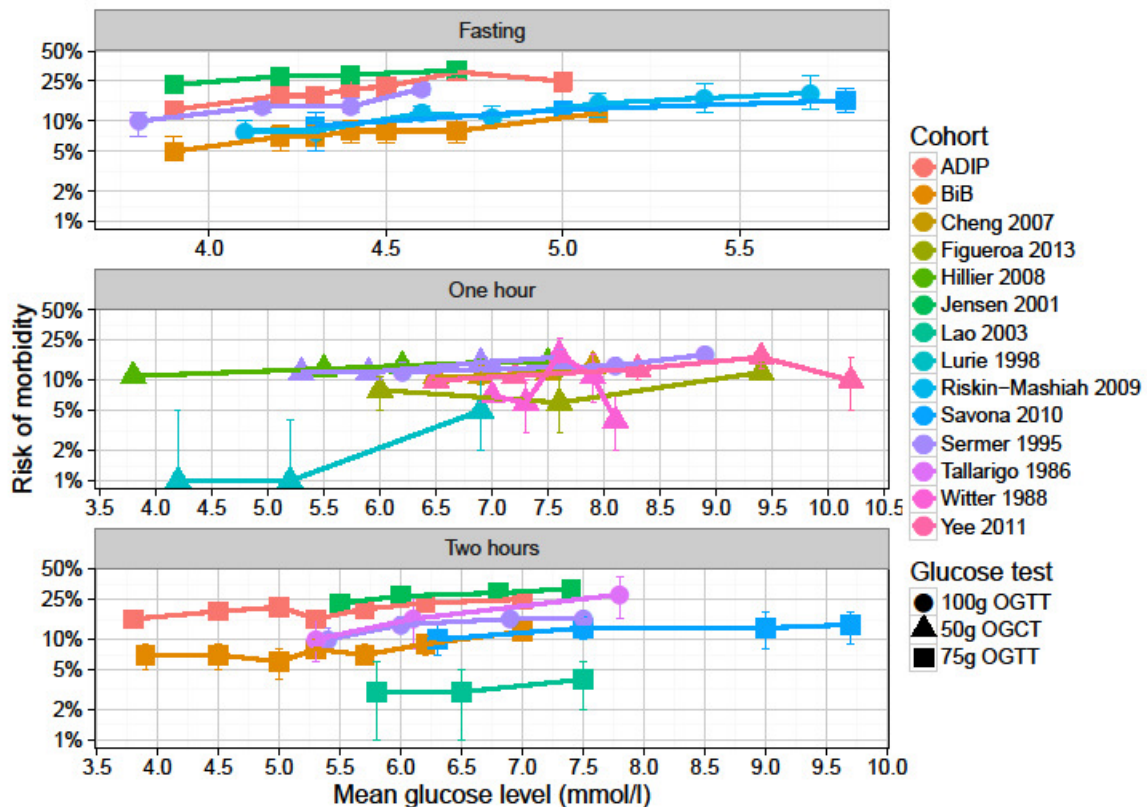

**Fig C** Risk of large for gestational age against glucose concentration for each study, glucose test, and timing

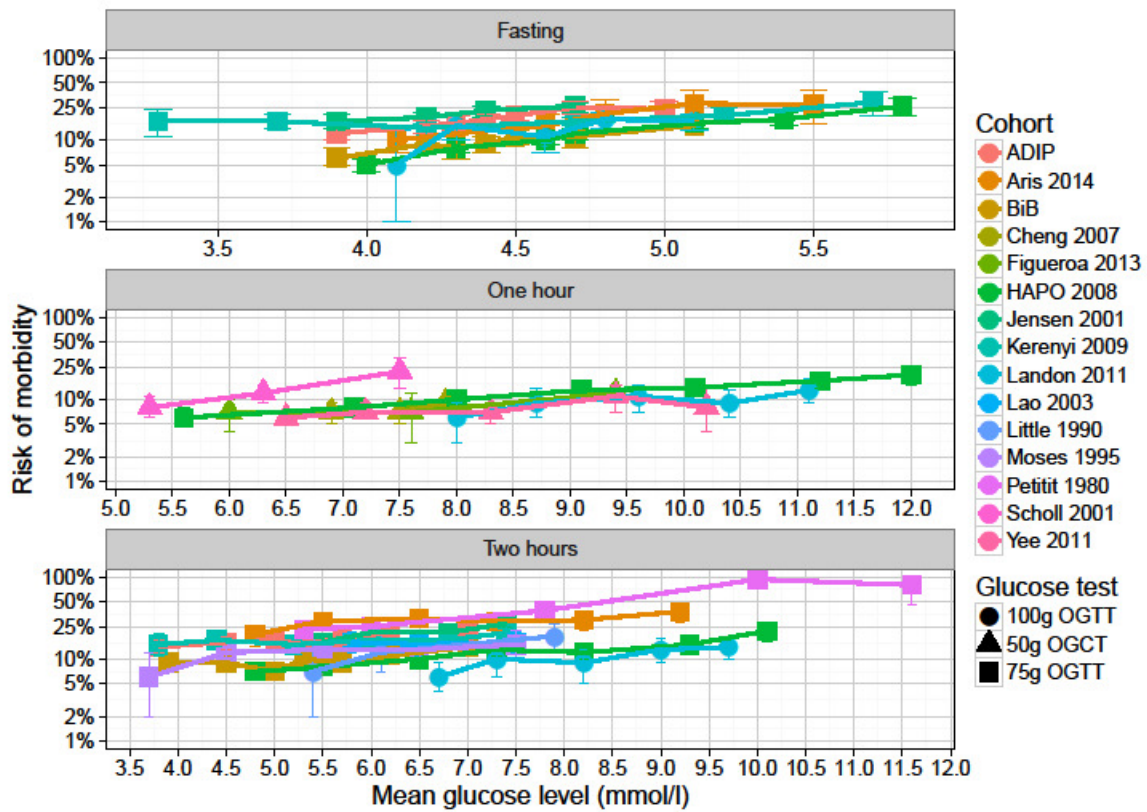

**Fig D** Risk of pre-eclampsia against glucose concentration for each study, glucose test, and timing

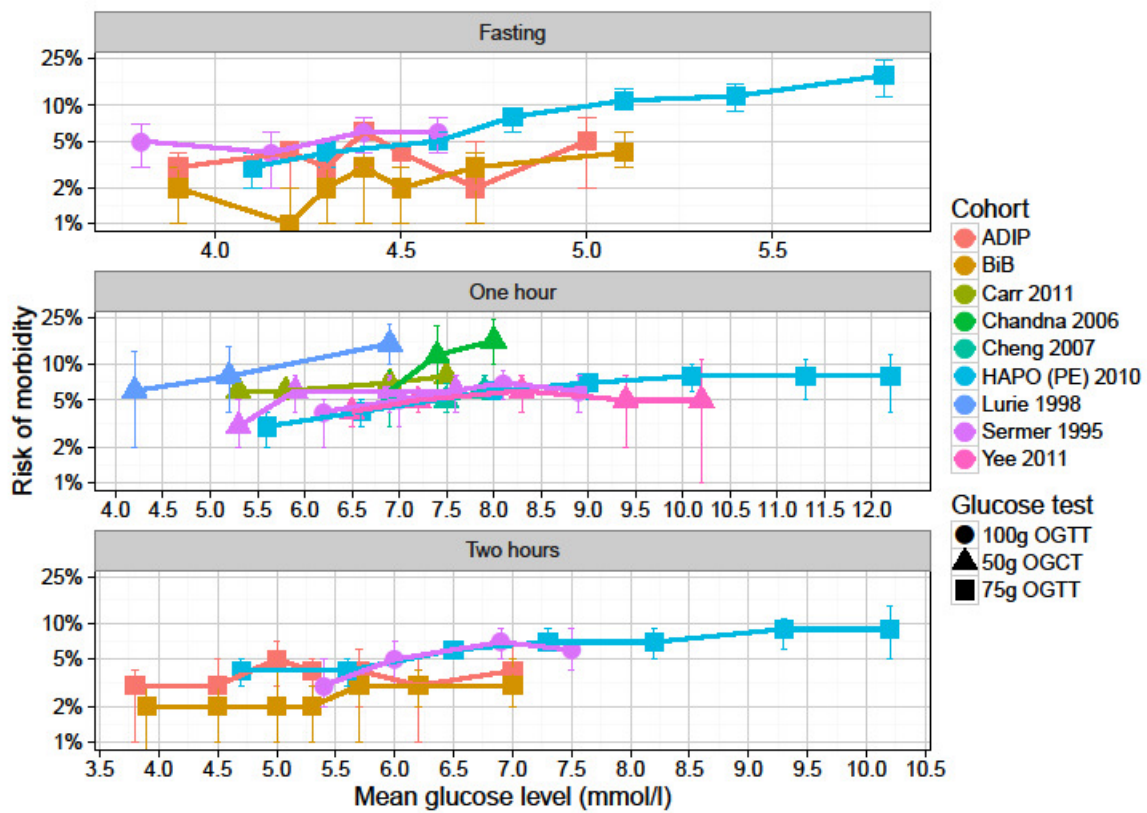

**Fig E** Risk of instrumental birth against glucose concentration for each study, glucose test, and timing

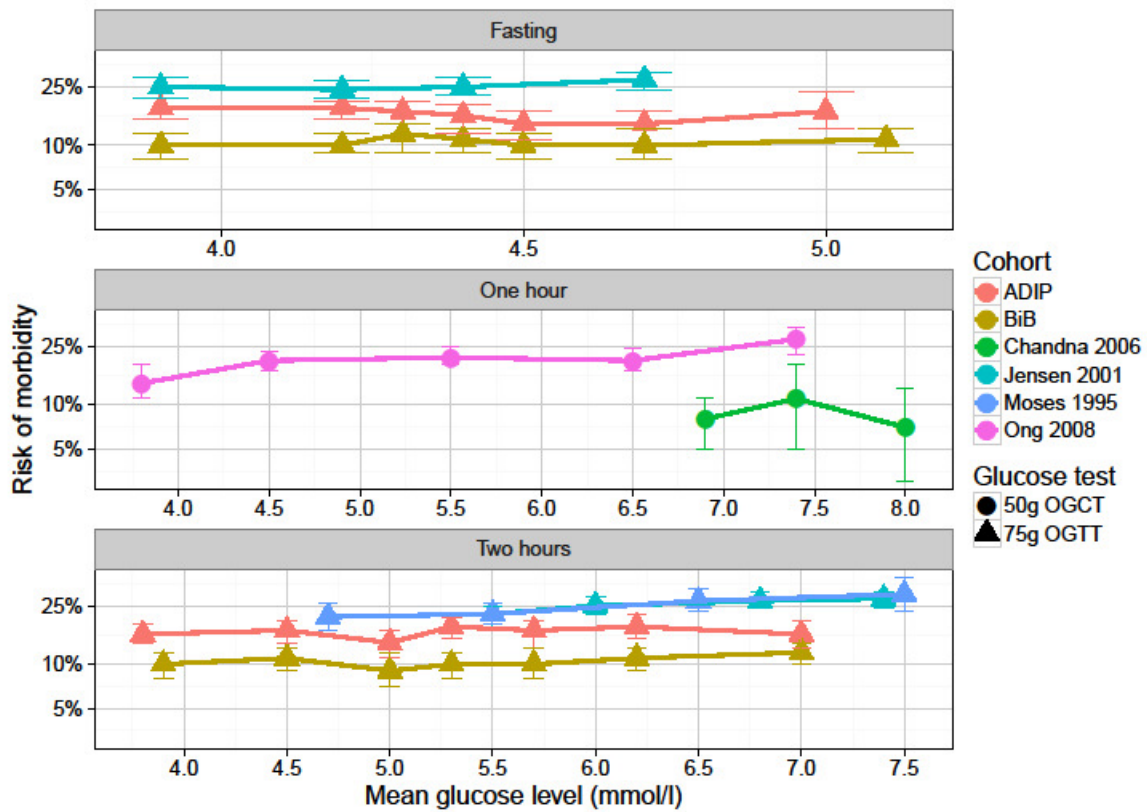

**Fig F** Risk of induction of labour against glucose concentration for each study, glucose test, and timing

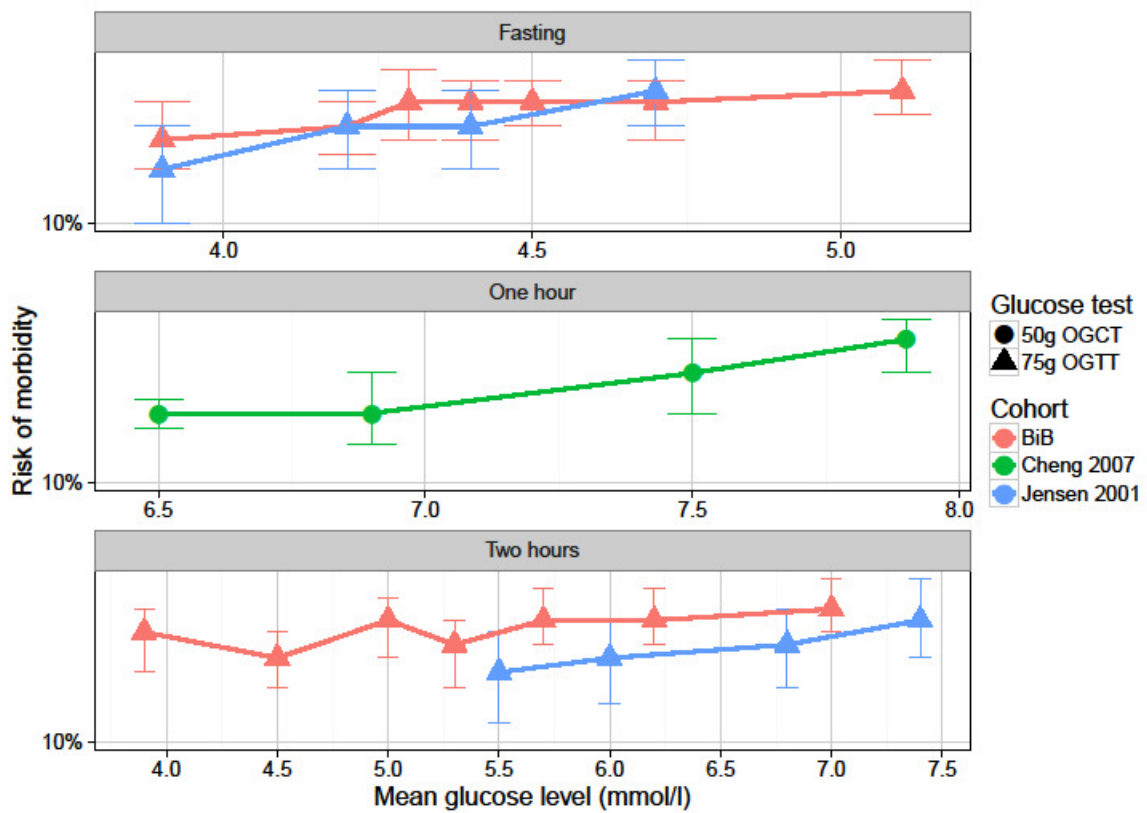

**Fig G** Risk of shoulder dystocia against glucose concentration for each study, glucose test, and timing

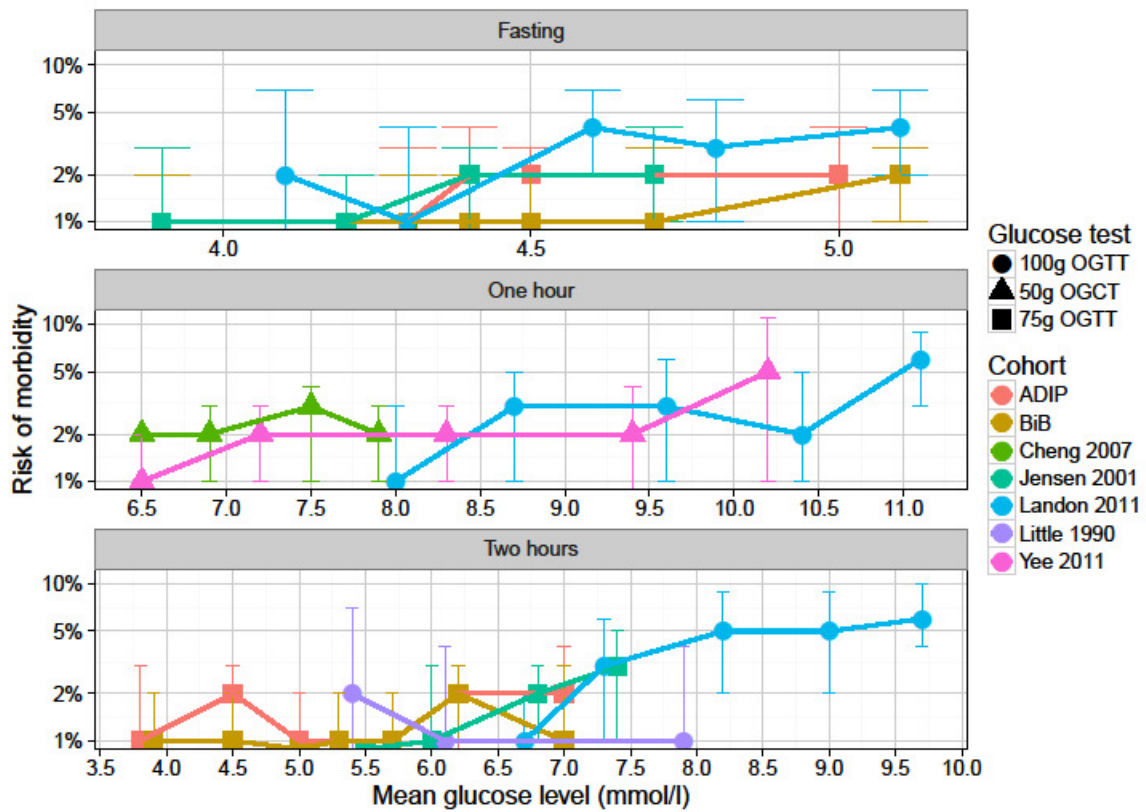

**Fig H** Risk of preterm birth against glucose concentration for each study, glucose test, and timing

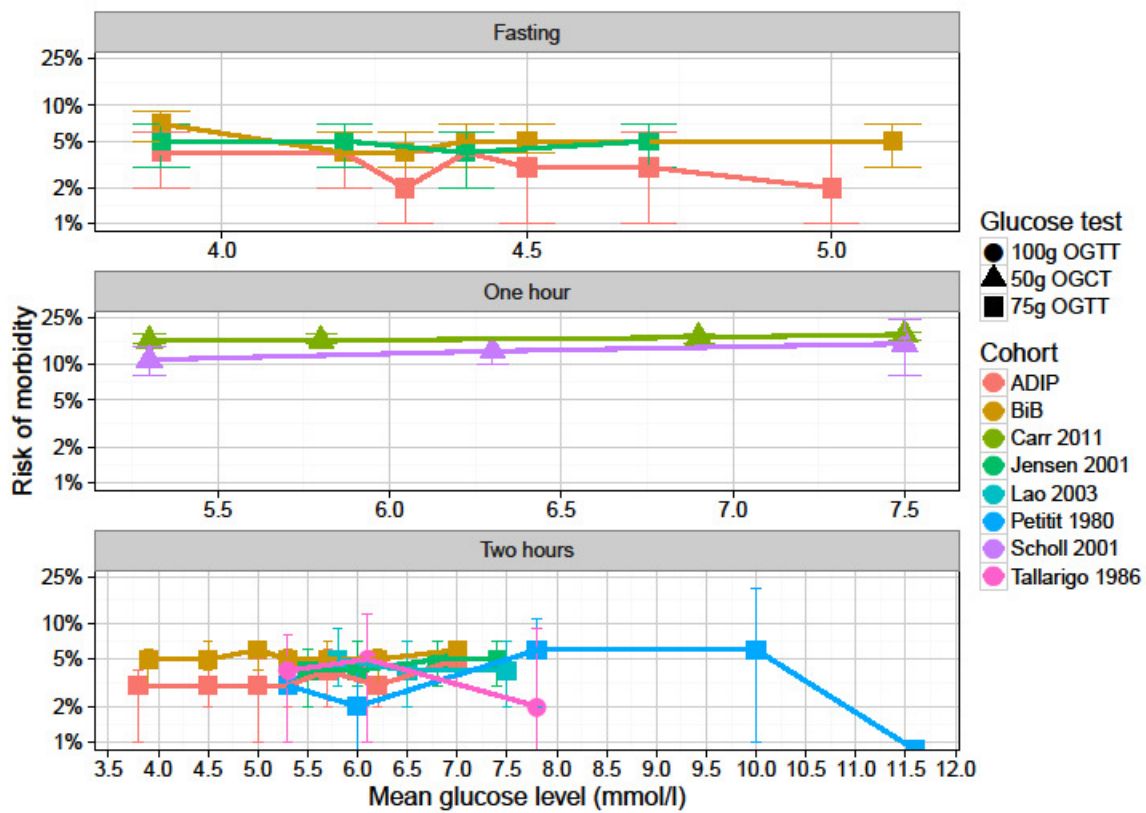

**Fig I** Risk of neonatal hypoglycaemia against glucose concentration for each study, glucose test, and timing

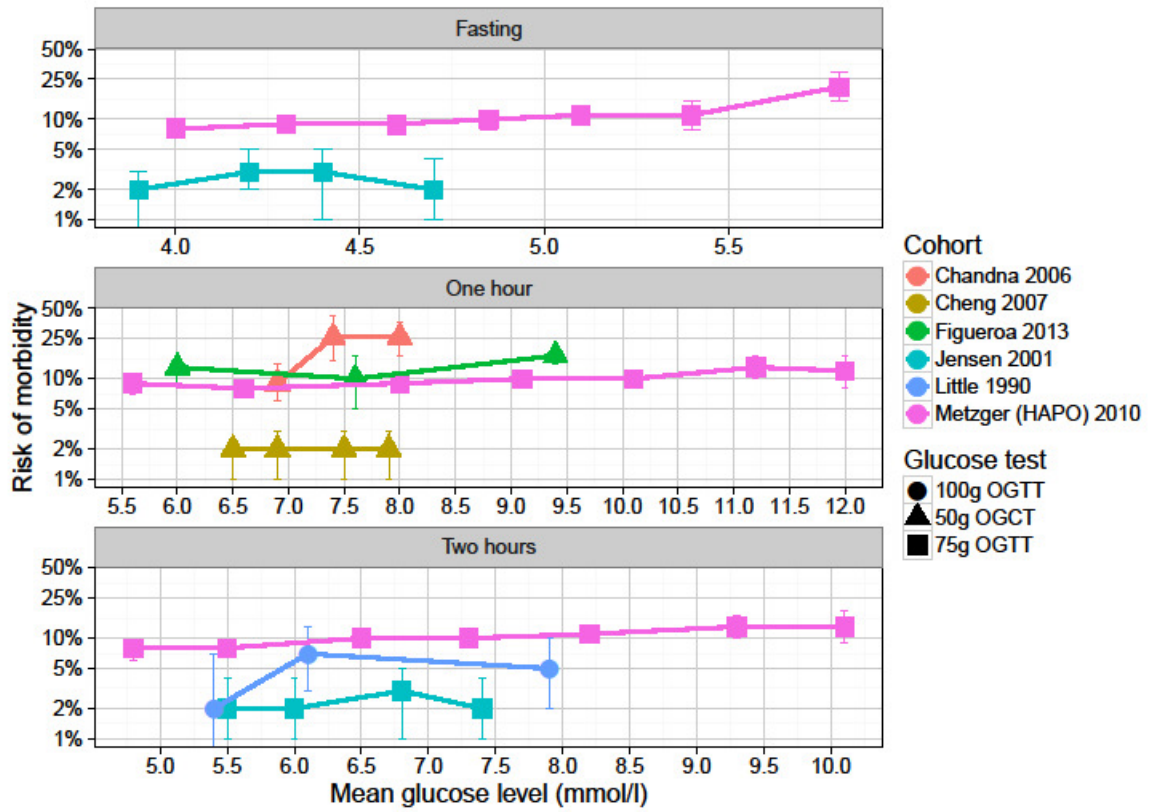

Supplement: fard032237.ww4_default.pdf [file fard032237.ww4_default.pdf]
